# Supplementary material for: Biofertilizer Based on Biochar and Metal-Tolerant Plant Growth Promoting Rhizobacteria Alleviates Copper Impact on Morphophysiological Traits in Brassica napus L.
Source: MDPI journal article supplement (doi:10.3390/microorganisms10112164), 2022-10-31
Supplement: s1 [file s1]

**Table S1.** Spearman's rank correlation between Cu concentration in shoot of *B. napus* and studied physiological and biochemical parameters.

| Parameter             | Cu content in shoot |
|-----------------------|---------------------|
| MDA                   | 0.455 *             |
| Chl <i>a</i>          | 0.688 *             |
| Chl <i>b</i>          | 0.813 *             |
| Carotenoids           | 0.542 *             |
| Total soluble phenols | 0.768 *             |
| Flavonoids            | 0.706 *             |
| Proline               | 0.669 *             |

Asterisks (\*) indicate significant correlations at  $p < 0.05$  (n = 36).

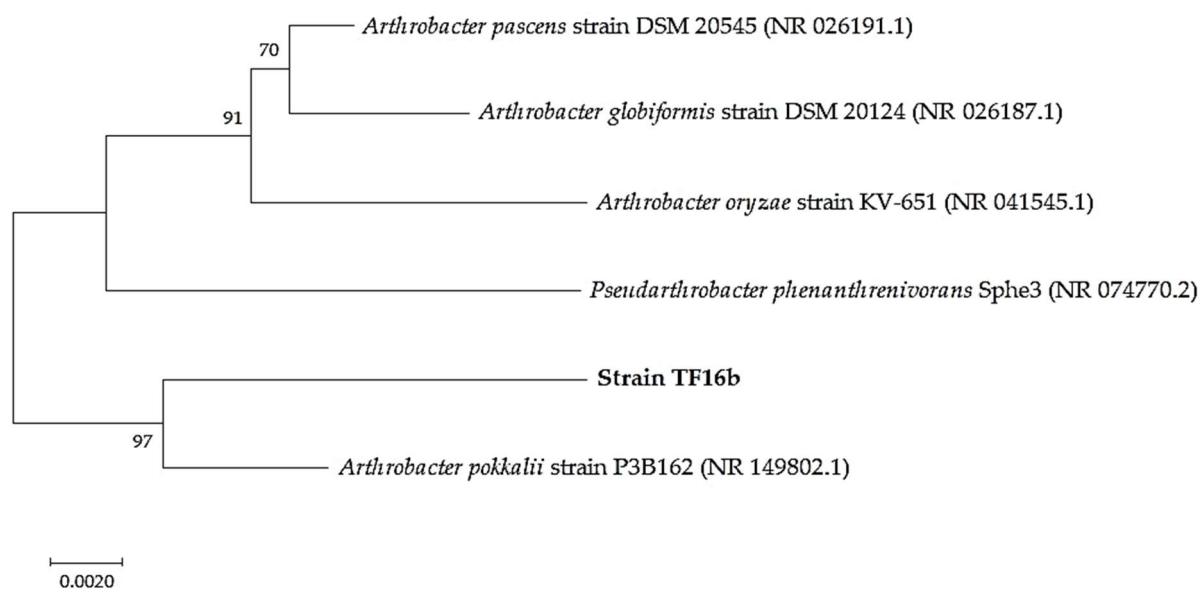

**Figure S1.** Phylogenetic tree based on partial sequences of the 16S rRNA gene of *Arthrobacter* sp. strain TF16b with other related sequences and identified bacteria from the NCBI database.

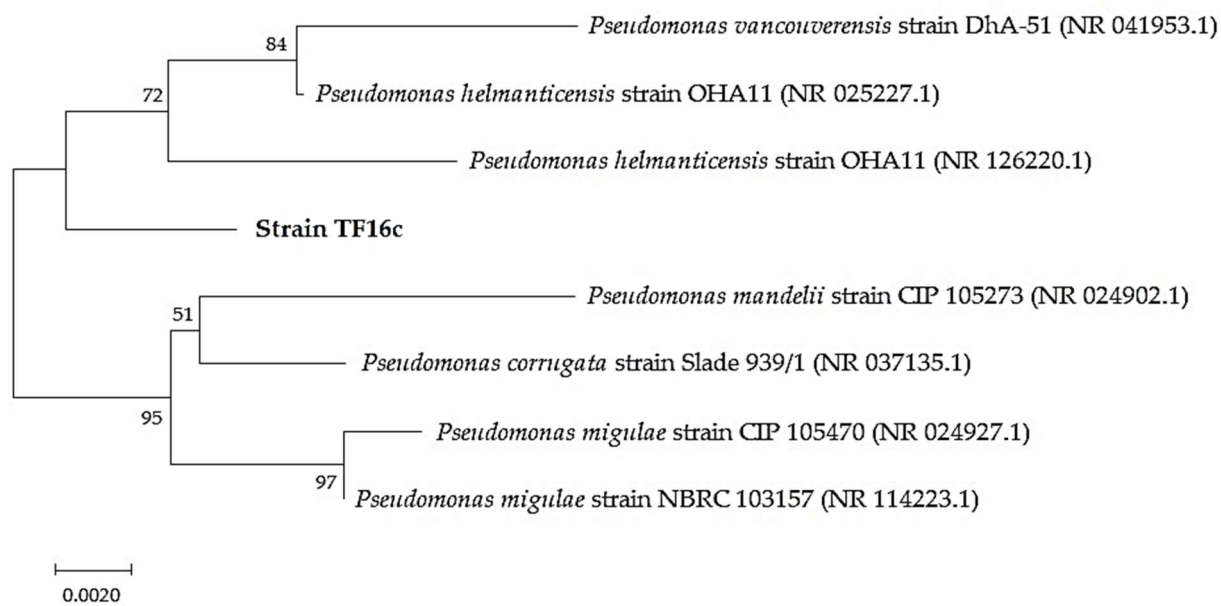

**Figure S2.** Phylogenetic tree based on partial sequences of the 16S rRNA gene of *Pseudomonas* sp. strain TF16c with other related sequences and identified bacteria from the NCBI database.
